# Supplementary material
Source: Springer Nature journal article supplement (https://www.springermedizin.de/resource/supplementary/12885_2012_3236_MOESM3_ESM.pdf/9463066)

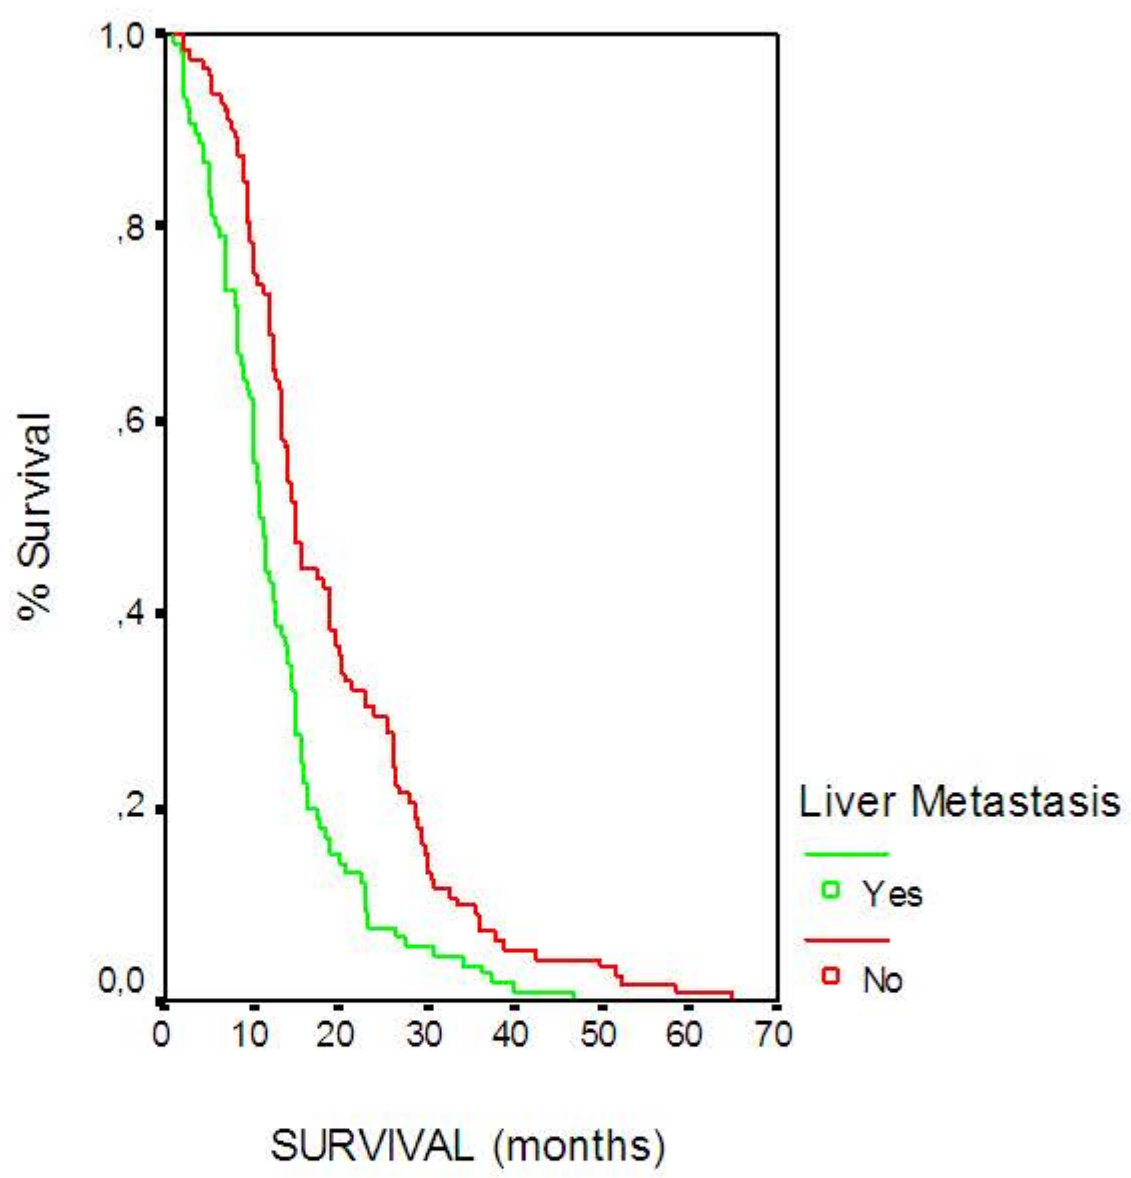

Supplement: MOESM3 [file 9463066]
